# Supplementary material for: Silk Vascular Grafts with Optimized Mechanical Properties for the Repair and Regeneration of Small Caliber Blood Vessels
Source: MDPI journal article supplement (doi:10.3390/ma15103735), 2022-05-23
Supplement: s1 [file s1]

## Supplementary Materials

# Silk Vascular Grafts with Optimized Mechanical Properties for the Repair and Regeneration of Small Caliber Blood Vessels

Elisa Valsecchi <sup>1</sup>, Marco Biagiotti <sup>1</sup>, Antonio Alessandrino <sup>1</sup>, Dario Gastaldi <sup>2</sup>, Pasquale Vena <sup>2</sup> and Giuliano Freddi <sup>1,\*</sup>

<sup>1</sup> Silk Biomaterials Srl, 22074 Lomazzo, Como, Italy; elisa@silkbiomaterials.com (E.V.); marco@silkbiomaterials.com (M.B.); antonio@silkbiomaterials.com (A.A.); giuliano@silkbiomaterials.com (G.F.)

<sup>2</sup> Department of Chemistry Materials and Chemical Engineering Giulio Natta; Laboratory of Biological Structures Mechanics-LaBS, Politecnico di Milano; dario.gastaldi@polimi.it (D.G.); pasquale.vena@polimi.it (P.V.)

\* Correspondence: giuliano@silkbiomaterials.com

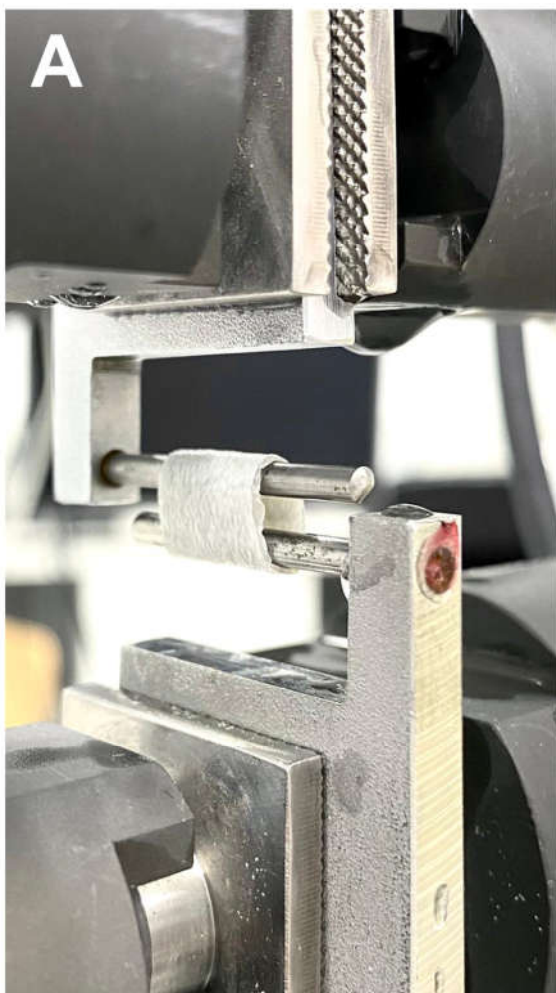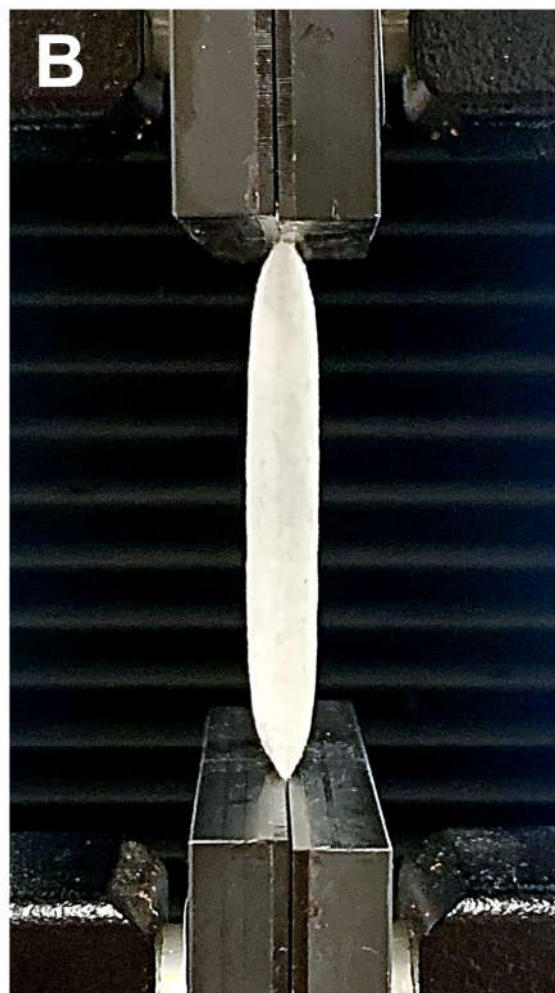

**Figure S1.** Set up of grips for mechanical testing: (A) Circumferential Tensile Test. (B) Uniaxial Tensile Test.

**Table S1.** Values of centerline average roughness height ( $R_a$ ), root mean square roughness height ( $R_q$ ), and maximum peak to through height ( $R_t$ ) measured in the longitudinal direction.

| Device variant | Sample | $R_a$ ( $\mu\text{m}$ ) | $R_q$ ( $\mu\text{m}$ ) | $R_z$ ( $\mu\text{m}$ ) |
|----------------|--------|-------------------------|-------------------------|-------------------------|
| SILKGraft-1    | 1      | $13.2 \pm 5.0$          | $16.0 \pm 6.3$          | $60.0 \pm 29.1$         |
|                | 2      | $14.7 \pm 3.5$          | $18.4 \pm 4.4$          | $61.0 \pm 11.6$         |
|                | 3      | $21.8 \pm 7.2$          | $26.5 \pm 7.5$          | $83.6 \pm 20.3$         |
|                | 4      | $13.3 \pm 2.6$          | $16.4 \pm 3.0$          | $50.9 \pm 7.5$          |
|                | 5      | $17.3 \pm 10.0$         | $20.5 \pm 11.1$         | $68.0 \pm 30.7$         |
|                | 6      | $9.7 \pm 2.1$           | $11.9 \pm 2.6$          | $40.2 \pm 7.6$          |
| SILKGraft-2    | 1      | $34.5 \pm 5.8$          | $42.7 \pm 7.4$          | $160.8 \pm 22.4$        |
|                | 2      | $20.0 \pm 5.9$          | $25.1 \pm 6.4$          | $96.6 \pm 19.1$         |
|                | 3      | $31.7 \pm 4.3$          | $39.8 \pm 5.0$          | $151.9 \pm 17.8$        |
|                | 4      | $33.8 \pm 3.6$          | $41.5 \pm 4.9$          | $157.8 \pm 12.3$        |
|                | 5      | $34.7 \pm 3.4$          | $43.4 \pm 3.8$          | $153.4 \pm 18.0$        |
|                | 6      | $25.1 \pm 2.8$          | $30.5 \pm 3.6$          | $108.6 \pm 13.1$        |

**Table S2.** Values of centerline average roughness height ( $R_a$ ), root mean square roughness height ( $R_q$ ), and maximum peak to through height ( $R_t$ ) measured in the transversal direction.

| Device variant | Sample | $R_a$ ( $\mu\text{m}$ ) | $R_q$ ( $\mu\text{m}$ ) | $R_z$ ( $\mu\text{m}$ ) |
|----------------|--------|-------------------------|-------------------------|-------------------------|
| SILKGraft-1    | 1      | $18.0 \pm 2.4$          | $23.3 \pm 2.1$          | $75.8 \pm 11.5$         |
|                | 2      | $15.9 \pm 1.3$          | $20.9 \pm 1.9$          | $64.9 \pm 8.1$          |
|                | 3      | $21.3 \pm 6.3$          | $26.5 \pm 8.6$          | $90.5 \pm 25.7$         |
|                | 4      | $22.4 \pm 1.9$          | $28.4 \pm 1.6$          | $93.3 \pm 4.2$          |
|                | 5      | $29.7 \pm 6.4$          | $36.0 \pm 6.8$          | $112.1 \pm 19.2$        |
|                | 6      | $17.9 \pm 2.5$          | $24.1 \pm 2.8$          | $85.5 \pm 13.9$         |
| SILKGraft-2    | 1      | $21.6 \pm 4.3$          | $26.3 \pm 4.8$          | $88.6 \pm 10.4$         |
|                | 2      | $22.3 \pm 2.1$          | $28.6 \pm 3.2$          | $100.8 \pm 13.6$        |
|                | 3      | $29.1 \pm 3.1$          | $35.6 \pm 4.0$          | $103.4 \pm 8.6$         |
|                | 4      | $26.6 \pm 5.6$          | $33.0 \pm 5.6$          | $101.5 \pm 8.7$         |
|                | 5      | $26.0 \pm 3.4$          | $32.0 \pm 2.9$          | $109.6 \pm 6.1$         |
|                | 6      | $19.6 \pm 2.1$          | $24.6 \pm 2.8$          | $84.9 \pm 4.8$          |

**Table S3.** Average values of centerline average roughness height ( $R_a$ ), root mean square roughness height ( $R_q$ ), and maximum peak to through height ( $R_t$ ) measured in the longitudinal direction.

| Device variant | $R_a$ ( $\mu\text{m}$ ) | $R_q$ ( $\mu\text{m}$ ) | $R_z$ ( $\mu\text{m}$ ) |
|----------------|-------------------------|-------------------------|-------------------------|
| SILKGraft-1    | $15.0 \pm 6.5$          | $18.3 \pm 7.5$          | $60.6 \pm 22.9$         |
| SILKGraft-2    | $30.0 \pm 6.9$          | $37.2 \pm 8.5$          | $138.2 \pm 30.5$        |

**Table S4.** Average values of centerline average roughness height ( $R_a$ ), root mean square roughness height ( $R_q$ ), and maximum peak to through height ( $R_t$ ) measured in the transversal direction.

| Device variant | $R_a$ ( $\mu\text{m}$ ) | $R_q$ ( $\mu\text{m}$ ) | $R_z$ ( $\mu\text{m}$ ) |
|----------------|-------------------------|-------------------------|-------------------------|
| SILKGraft-1    | $20.9 \pm 5.9$          | $26.5 \pm 6.6$          | $87.0 \pm 20.6$         |
| SILKGraft-2    | $24.2 \pm 4.7$          | $30.0 \pm 5.3$          | $98.1 \pm 12.1$         |
